# Supplementary material
Source: PubMed Central journal article supplement (PMC11745098)
Supplement: media-1.pdf [file media-1.pdf]

## SUPPLEMENTAL TABLES AND FIGURES

### **Structure of dimerized assimilatory NADPH-dependent sulfite reductase reveals the minimal interface for diflavin reductase binding**

Behrouz Ghazi Esfahani<sup>1</sup>, Nidhi Walia<sup>1,2</sup>, Kasahun Neselu<sup>3</sup>, Yashika Garg<sup>1</sup>, Mahira Aragon<sup>3</sup>, Isabel Askenasy<sup>1,4</sup>, Hui Alex Wei<sup>3,5</sup>, Joshua H. Mendez<sup>3</sup>, and M. Elizabeth Stroupe<sup>1</sup>

<sup>1</sup>Department of Biological Science and Institute of Molecular Biophysics, Florida State University, Tallahassee, FL, 32303, USA

<sup>2</sup>Current Location: Department of Biochemistry, Purdue University, West Lafayette, IN, 47907, USA

<sup>3</sup>New York Structural Biology Center, New York, NY, 10027, USA

<sup>4</sup>Current Location: Department of Biochemistry, University of Cambridge, Cambridge, CB2 1QW, UK

<sup>5</sup>Current Location: Department of Microbiology, Biochemistry, and Molecular Genetics, Rutgers New Jersey Medical School, 225 Warren St. Room E440U, Newark, NJ, 07103

**Corresponding Author:** M. Elizabeth Stroupe

**Address:** Florida State University  
91 Chieftain Way  
Tallahassee, FL 32306

**Phone:** 850-645-1751

**e-mail:** [mestroupe@bio.fsu.edu](mailto:mestroupe@bio.fsu.edu)

| Variable                                                                                        | SiRFP-43/SiRHP                                                                                         | SiRFP-60 $\Delta$ /SiRHP                                                                    | SiRFP-60X/SiRHP                                                                                               |
|-------------------------------------------------------------------------------------------------|--------------------------------------------------------------------------------------------------------|---------------------------------------------------------------------------------------------|---------------------------------------------------------------------------------------------------------------|
| Expression                                                                                      | co-lysis                                                                                               | co-lysis                                                                                    | reconstitution                                                                                                |
| SiRFP variant (including the amino acids expressed) and the mass from which the name is derived | N-terminal octamerization and Fld- domain truncated, monomeric 43 kDa FNR domain (amino acids 237-599) | 60 kDa monomer with linker truncation ( $\Delta$ AAPSQS) (amino acids 53-599 minus 212-217) | 60 kDa crosslinked monomer with four engineered variants: C162T, C552S, E121C, and N556C (amino acids 53-599) |
| Theoretical mass of the complex (kDa)                                                           | 107                                                                                                    | 123                                                                                         | 124                                                                                                           |
| Ability to complement SiRFP-deficient <i>Escherichia coli</i> without exogenous S <sup>2-</sup> | -                                                                                                      | -                                                                                           | -                                                                                                             |

**Table S1.** Expression system, nomenclature, mass, and activity for each heterodimer.

| Sample assembly                | SiRFP-43/SiRHP | SiRFP-60 $\Delta$ /SiRHP | SiRFP-60X/SiRHP |
|--------------------------------|----------------|--------------------------|-----------------|
| SiRFP-43/SiRHP                 | Titan Krios    | Titan Krios              | Titan Krios     |
| Voltage (KV)                   | 300            | 300                      | 300             |
| Camera                         | K3             | K3                       | Apollo          |
| Magnification                  | 105 K          | 105 K                    | 59 K            |
| Total dose (e/Å <sup>2</sup> ) | 60             | 60                       | 60              |
| Pixel size (Å)                 | 0.844          | 0.844                    | 0.765           |
| Number of movies               | 14,628         | 25,488                   | 9,963           |
| Number of particles            | 1,500,000      | 550,000                  | 179,000         |
| Resolution (Å)                 | 3.47*          | 3.49                     | 2.78            |
| Data collection location       | NYSBC          | NYSBC                    | FSU BSIR        |

**Table S2.** Data collection parameters and final reconstruction information.

\*Nominal resolution

| <b>Parameter</b>                     | <b>Value</b> |
|--------------------------------------|--------------|
| <b>Mean B-factor (Å<sup>2</sup>)</b> | 57.2         |
| <b>Map CC</b>                        | 0.86         |
| <b>RMSD [bonds] (Å)</b>              | 0.003        |
| <b>RMSD [angles] (Å)</b>             | 0.632        |
| <b>All-atom clash-score</b>          | 7.3          |
| <b>Ramachandran plot</b>             |              |
| Favored (%)                          | 96.4         |
| Allowed (%)                          | 3.50         |
| Outliers (%)                         | 0.09         |
| <b>Rotamer outliers (%)</b>          | 0.98         |
| <b>C-β deviations (%)</b>            | 0.00         |
| <b>PDB ID</b>                        | 9C91         |
| <b>EMDB ID</b>                       | EMD-45359    |

**Table S3.** Model refinement and validation statistics.

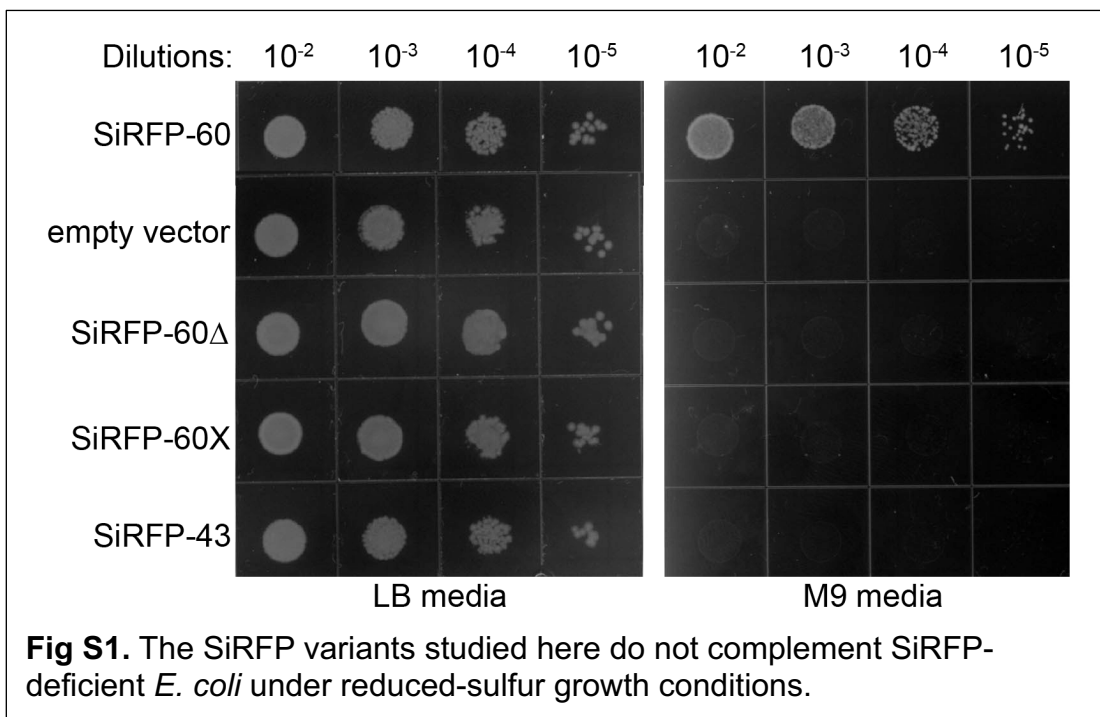

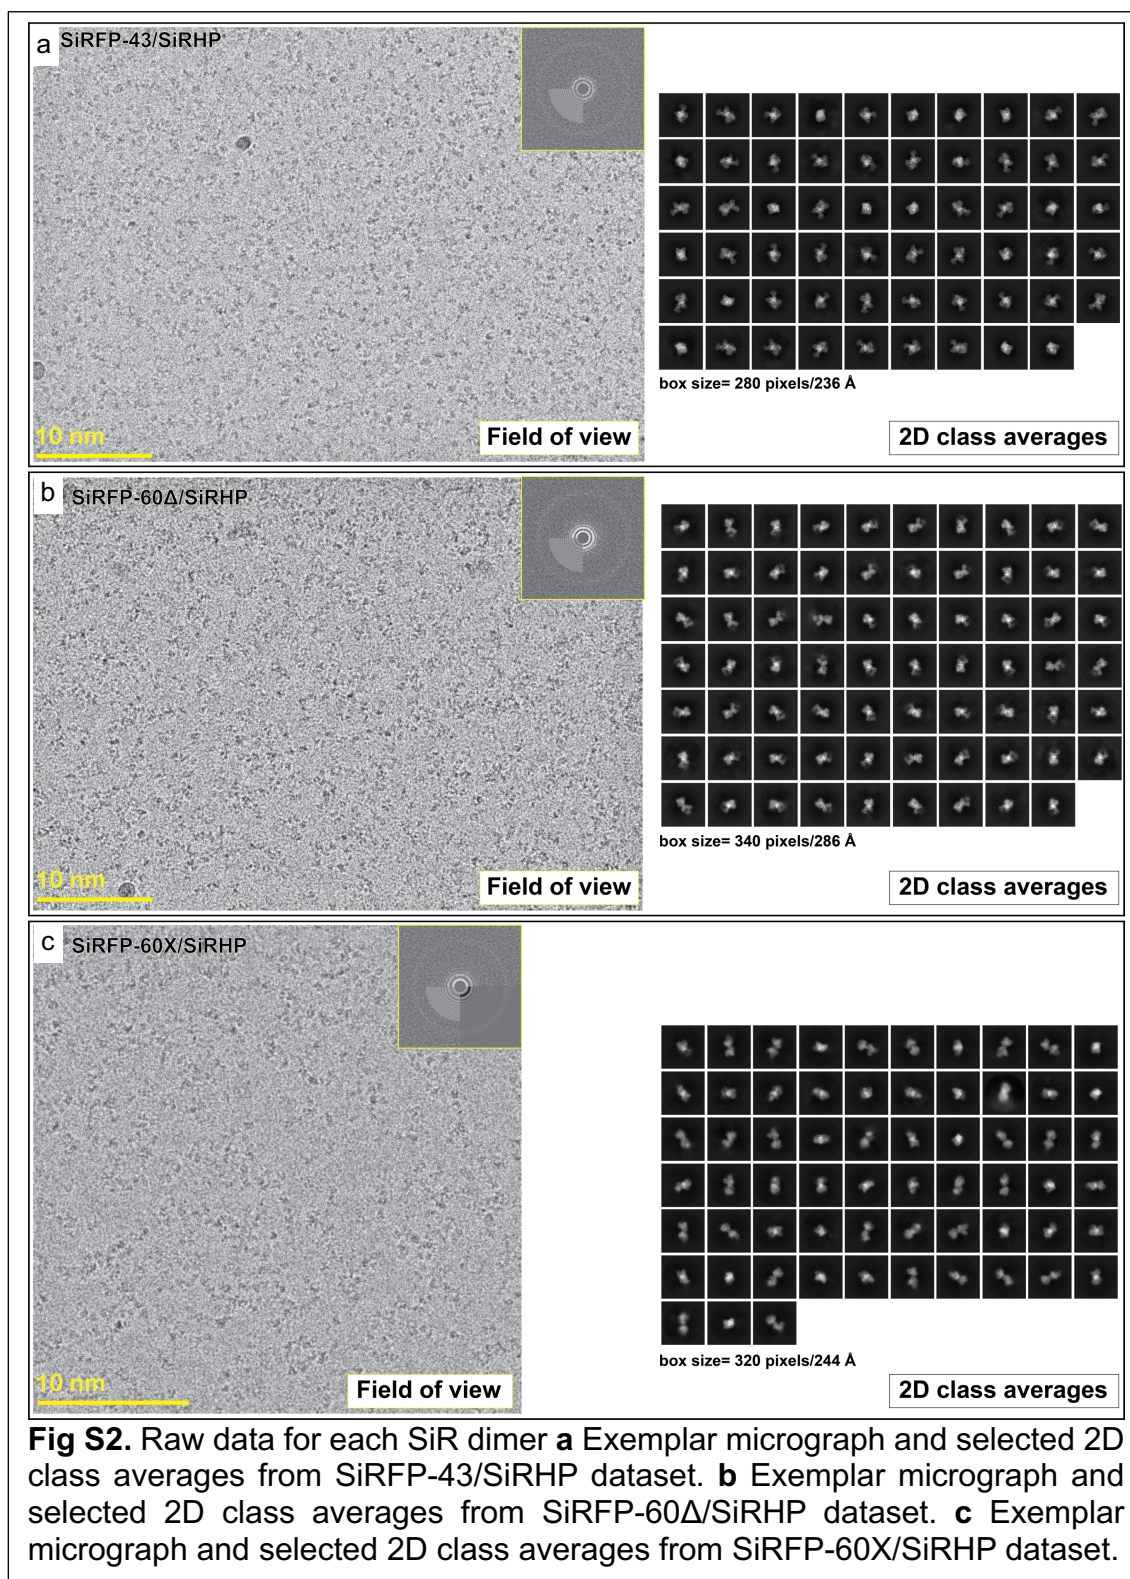

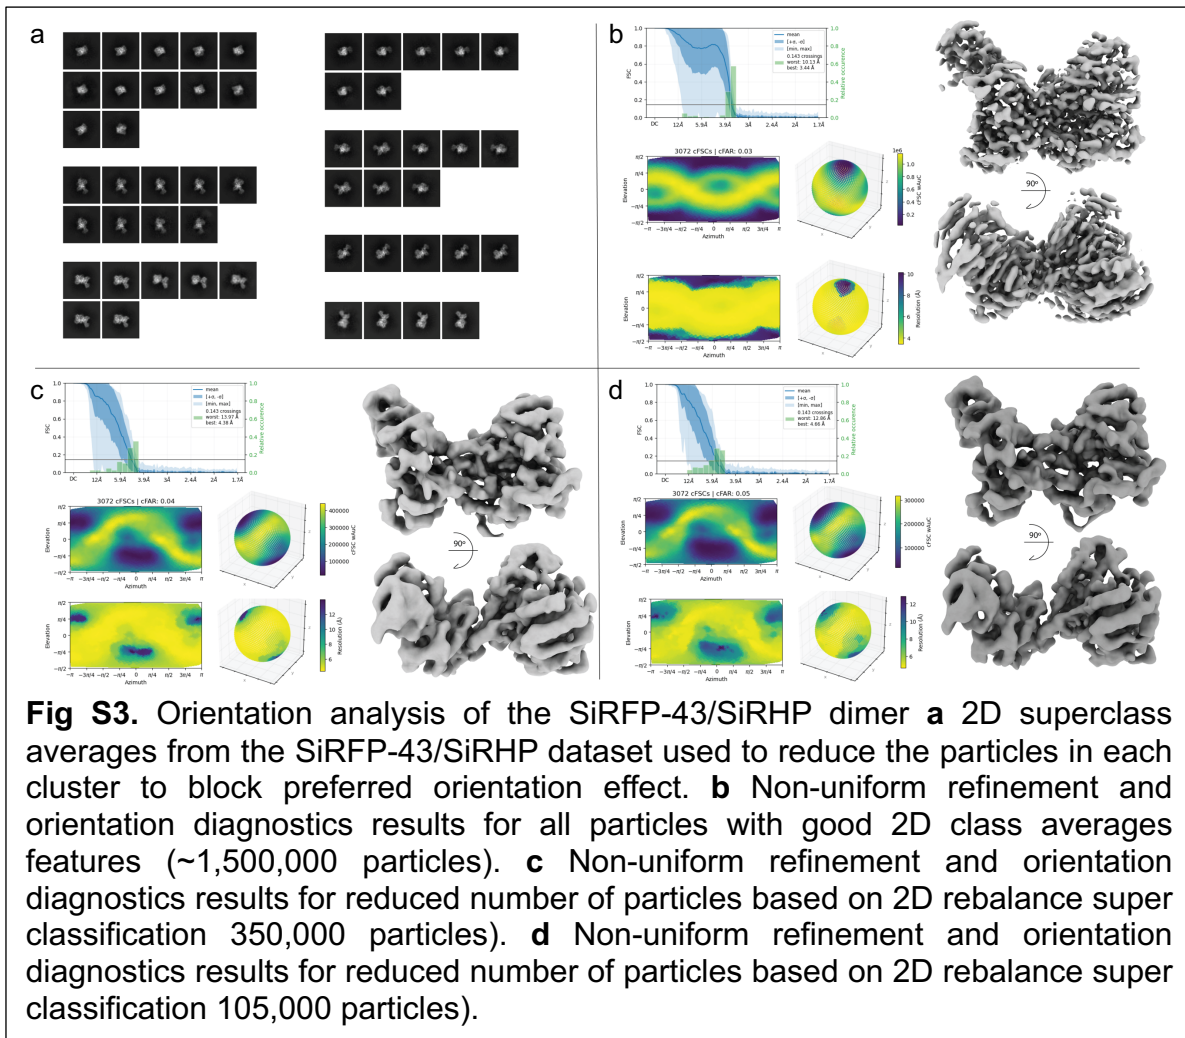

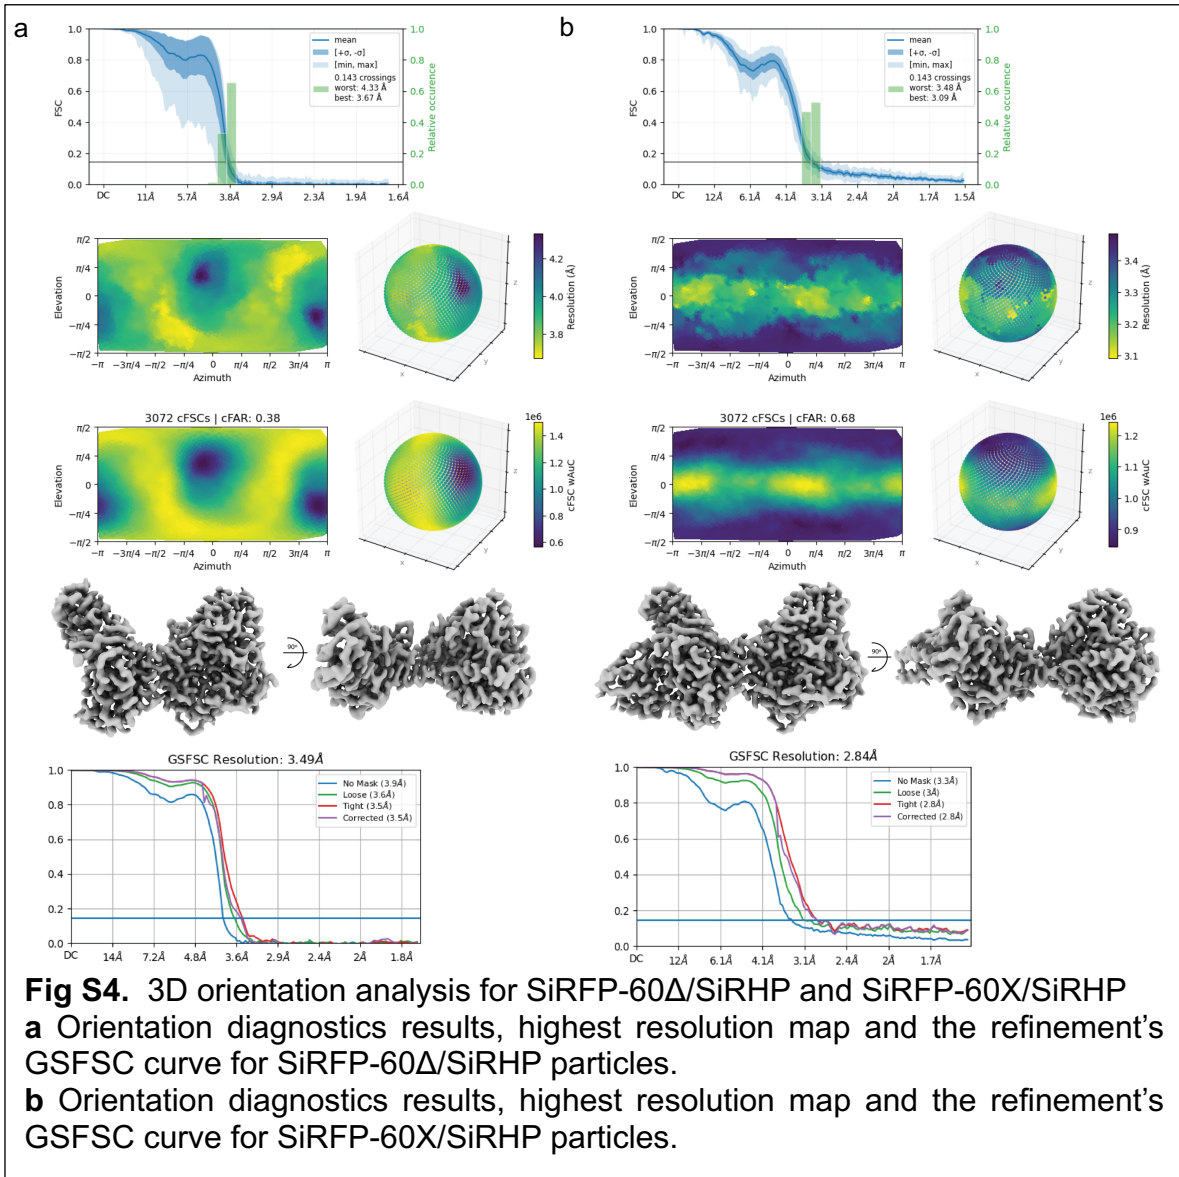

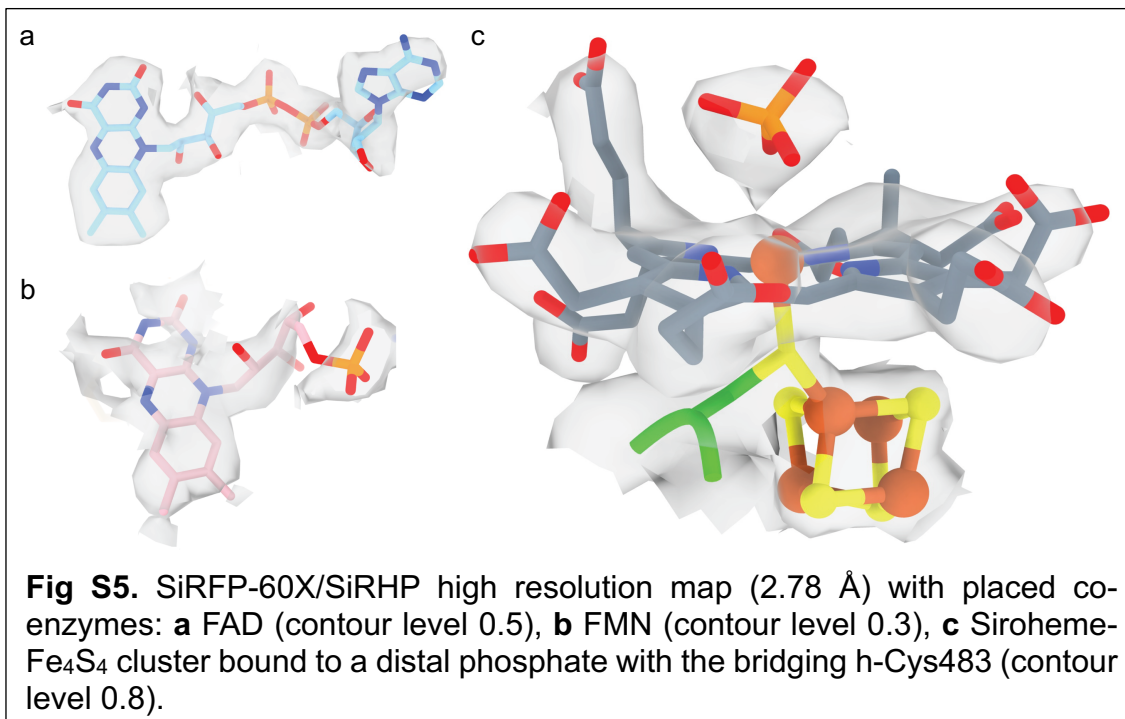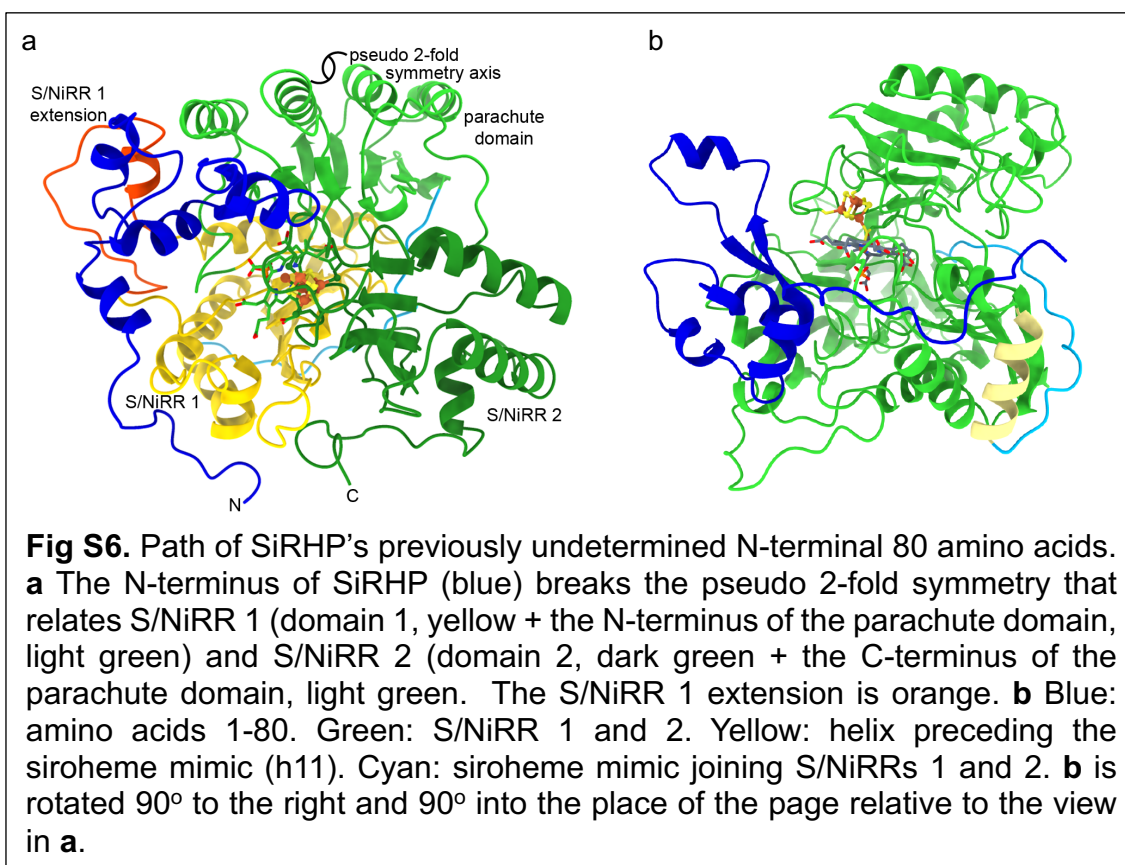



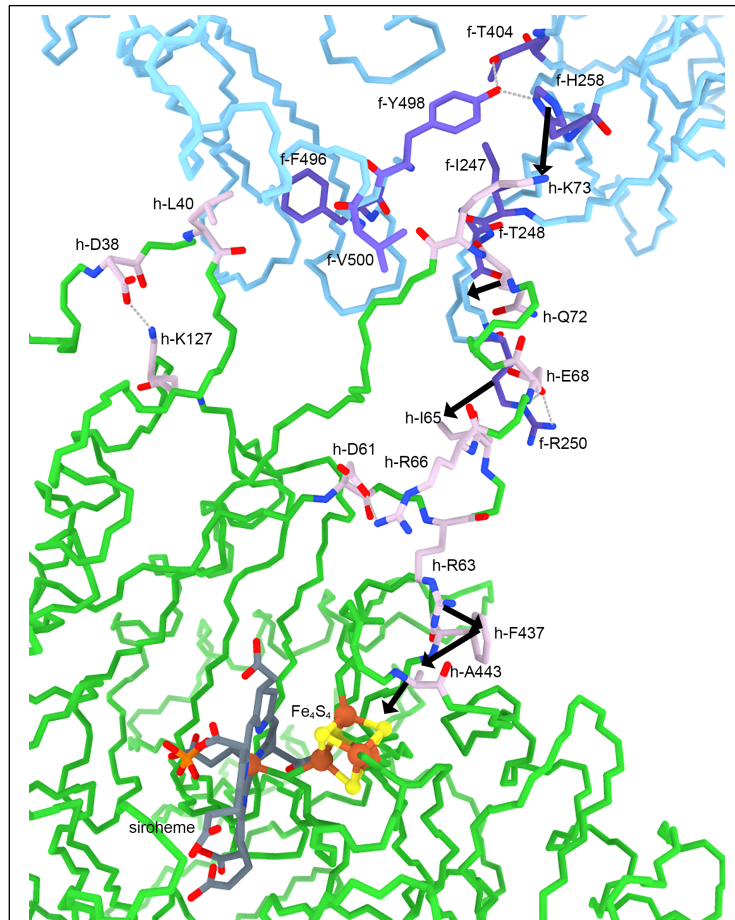

**Fig S7.** An extensive network of hydrophobic interactions, ionic bonds, and hydrogen bonds bridge from the SiRFP/SiRHP interface to the active site. Through space ionic or hydrogen bonds are represented by gray dashed lines. Through space hydrophobic interactions are represented by black arrows.



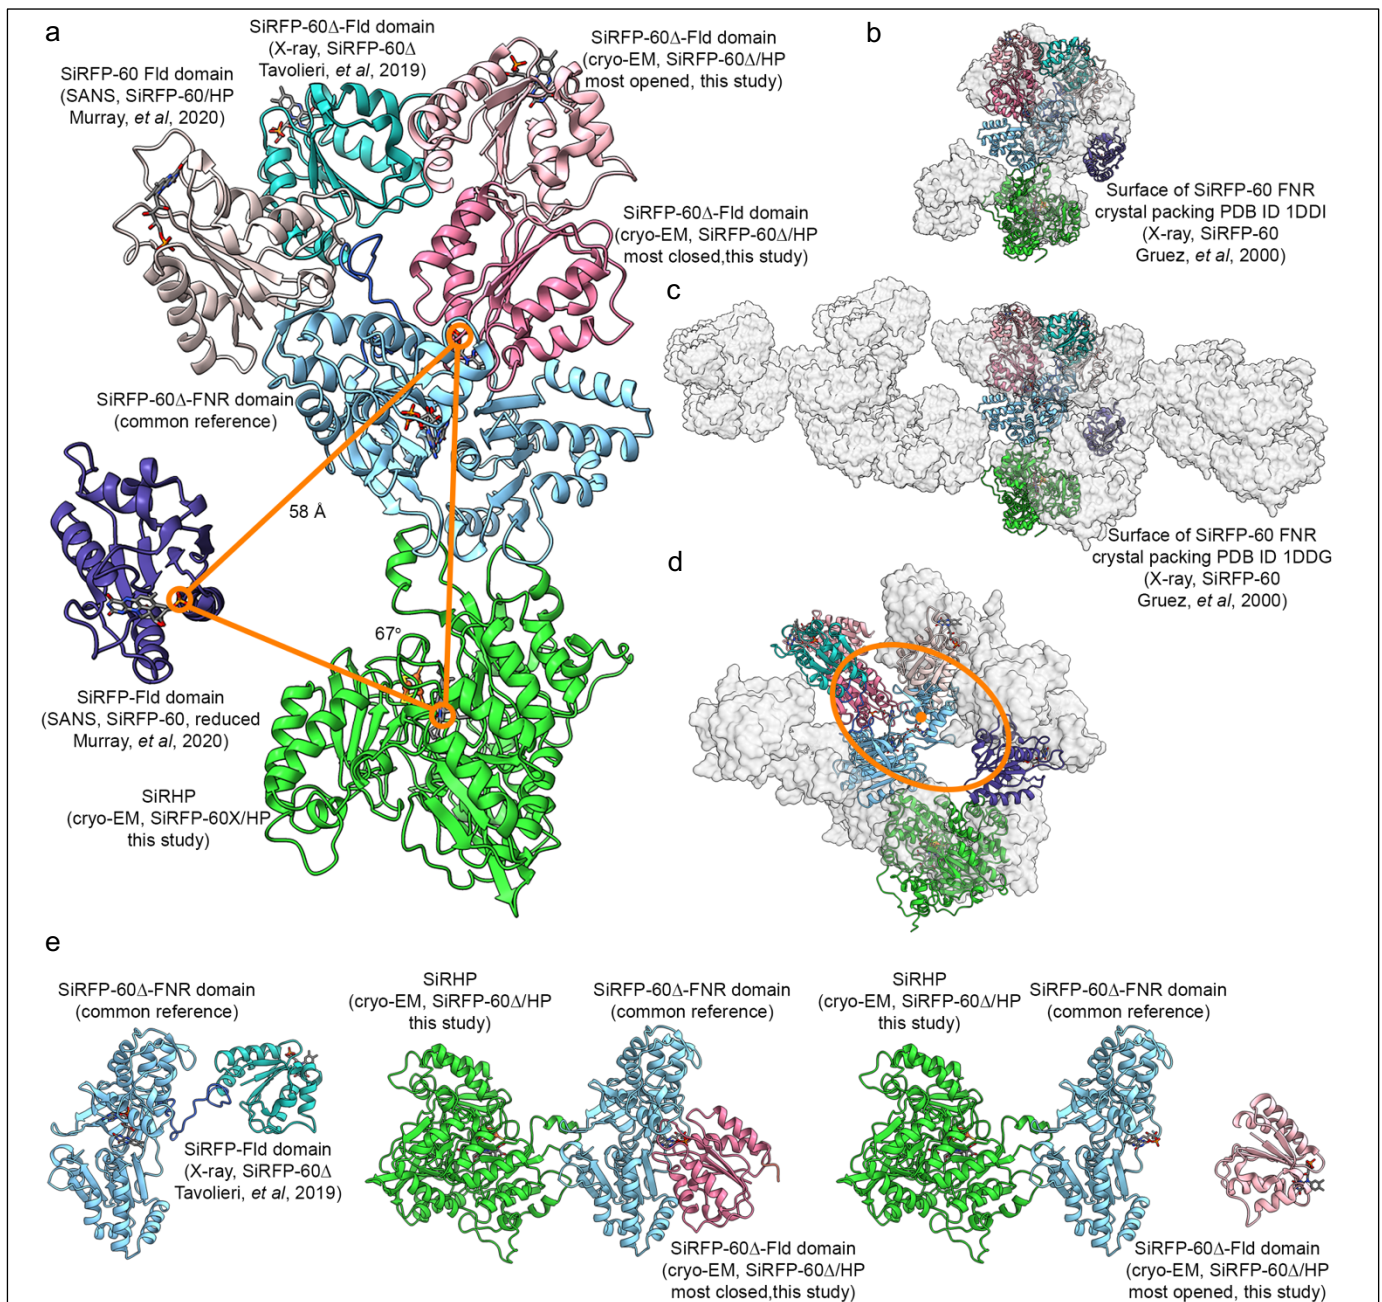

**Fig. S9.** The SiRFP-60 Fld domain is mobile. **a** Each position was determined by cryo-EM (this study, showing the most extreme positions from the SiRFP-60Δ/SiRHP series of structures), X-ray crystallography<sup>2</sup>, or SANS<sup>3</sup>. The position of the Fld domain is dependent on the SiRFP oxidation state or SiRHP binding. **b** When SiRFP-60 is crystallized, the Fld domain is not ordered although it is present<sup>4</sup>, leaving large solvent channels that can accommodate the positions of the Fld domain captured by SANS<sup>3</sup>, X-ray crystallography of SiRFP-60Δ<sup>2</sup>, or cryo-EM of SiRFP-60Δ/SiRHP. **c** Another SiRFP-60 crystal form<sup>4</sup> has solvent channels that accommodate the Fld domain in some positions. **b** and **c** are oriented 90° to the left around a vertical axis from where they are positioned in **a** and colored the same. SiRHP is only present in the cryo-EM structure. **d** The Fld domain can adopt positions along an elliptical cone shape relative to the FNR domain, accommodated in the channels from the crystal form shown in **b** (rotated 90° to the left and out of the page relative to **b**). **e** SiRFP-60Δ is shown with the FNR domain in a common position to demonstrate the different orientations of the Fld domain. The linker is not visible in this cryo-EM reconstruction. The most extreme closed or open positions of the Fld domain are shown. The closed position is similar to that seen in SiRFP-60X/SiRHP.

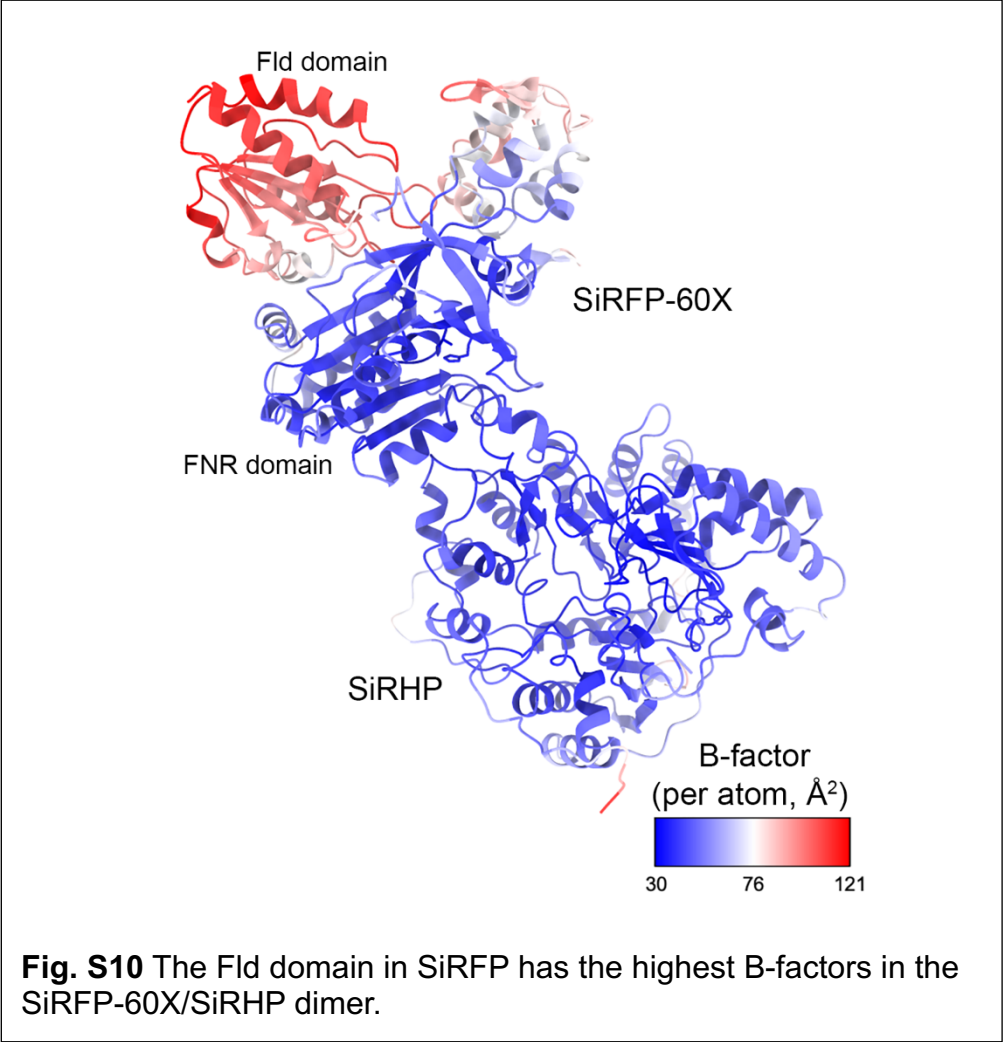

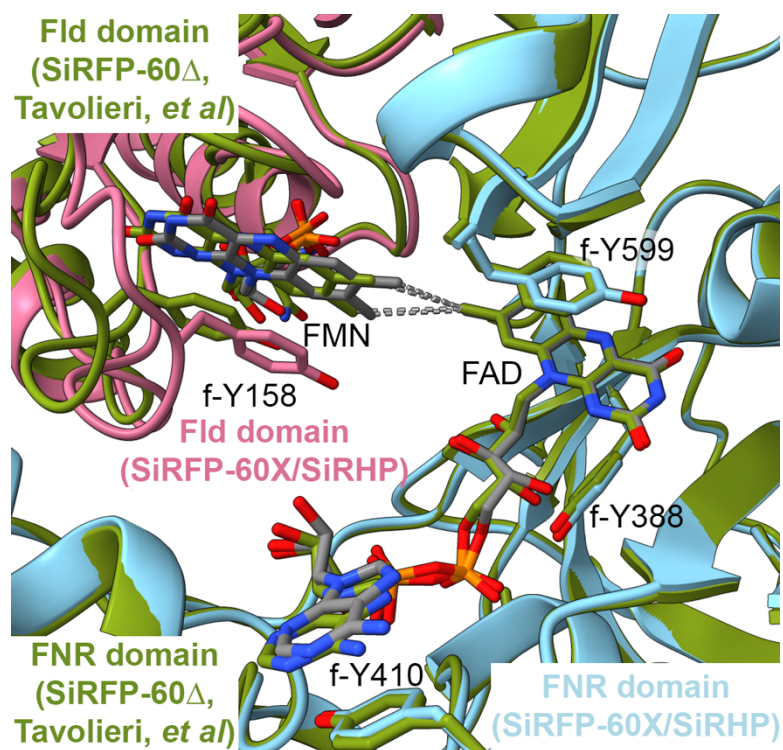

**Fig. S11.** SiRHP binding does not effect flavin (gray) binding to SiRFP-60X (pink and light blue) compared to their binding in SiRFP-60 $\Delta^2$  (olive green). The crosslink between the Fld (pink) and FNR (blue) domains shifts the FMN and the FMN binding loop towards the FNR domain.

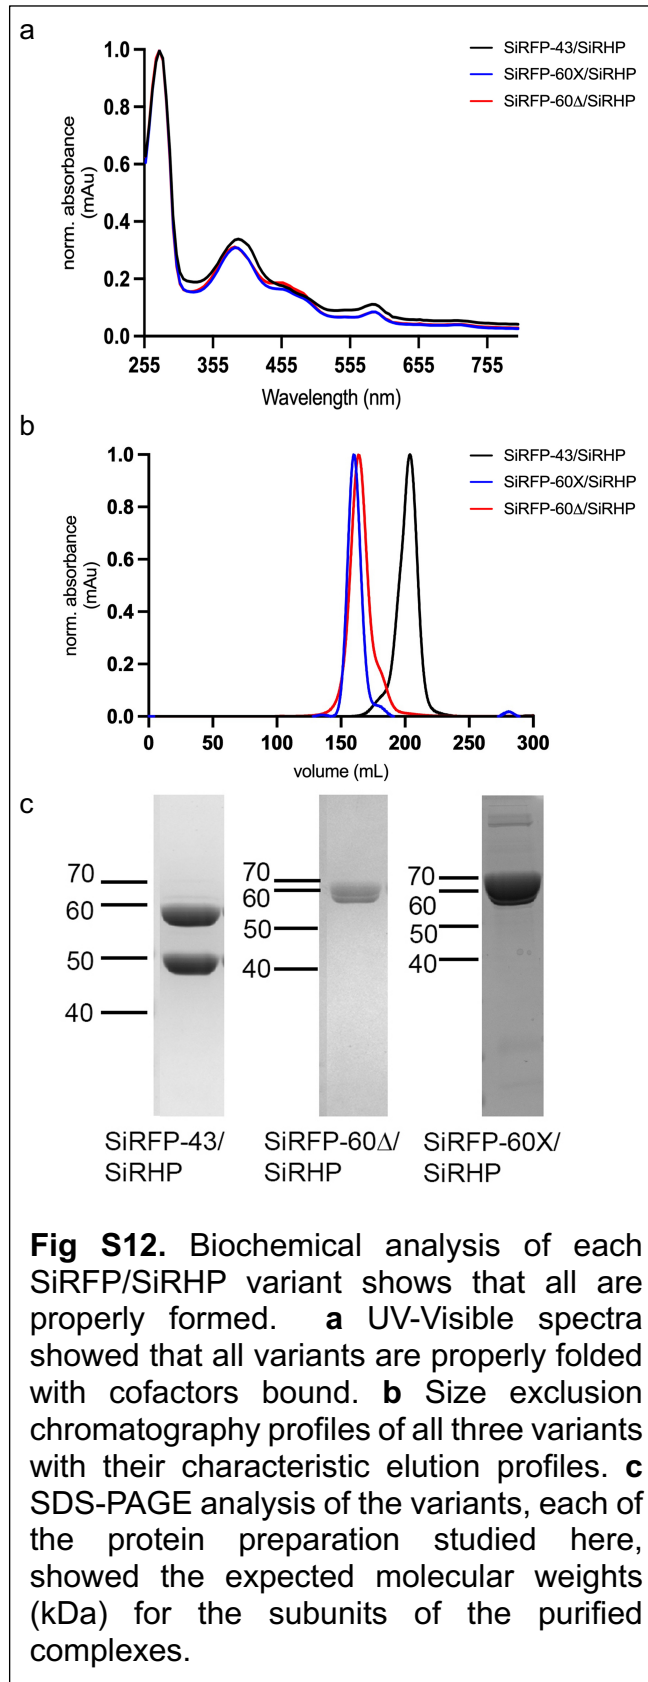

**Video S1.** Swinging Fld domain shown in motion, obtained from SiRFP-60Δ/SiRHP dataset via CryoDRGN showing one of the latent spaces out of two.

## REFERENCES

- 1 Pettersen, E. F. *et al.* UCSF Chimera - A visualization system for exploratory research and analysis. *Journal of Computational Chemistry* **25**, 1605-1612 (2004).  
<https://doi.org/10.1002/jcc.20084>
- 2 Tavolieri, A. M. *et al.* NADPH-dependent sulfite reductase flavoprotein adopts an extended conformation unique to this diflavin reductase. *J Struct Biol* (2019).  
<https://doi.org/10.1016/j.jsb.2019.01.001>
- 3 Murray, D. T., Weiss, K. L., Stanley, C. B., Nagy, G. & Stroupe, M. E. Small-angle neutron scattering solution structures of NADPH-dependent sulfite reductase. *J Struct Biol* **213**, 107724 (2021). <https://doi.org/10.1016/j.jsb.2021.107724>
- 4 Gruez, A. *et al.* Four crystal structures of the 60 kDa flavoprotein monomer of the sulfite reductase indicate a disordered flavodoxin-like module. *J Mol Biol* **299**, 199-212 (2000).  
<https://doi.org/10.1006/jmbi.2000.3748> S0022-2836(00)93748-3 [pii]
